# Supplementary material for: Mechanochemically-mediated dynamic imine bond conjugation for drug delivery using carbon dots
Source: Royal Society of Chemistry journal article supplement (doi:10.1039/d5nr03355a), 2025-01-01
Supplement: d5nr03355a1.pdf [file d5nr03355a1.pdf]

## Supplementary Information

### Mechanochemically-Mediated Dynamic Imine Bond Conjugation for Drug Delivery Using Carbon Dots

**Gianluca Fuoco,<sup>a,b</sup> Gabrielle A. Mandl,<sup>a,b</sup> Carissa De Mesa,<sup>a,b</sup> John A. Capobianco<sup>a,b</sup> and  
Rafik Naccache<sup>a,b,\*</sup>**

- a. Department of Chemistry and Biochemistry and the Centre for NanoScience Research,  
Concordia University, Montreal H4B 1R6, Canada*
- b. Quebec Centre for Advanced Materials, Concordia University, Montreal H4B 1R6, Canada*

\* Corresponding author email: [rafik.naccache@concordia.ca](mailto:rafik.naccache@concordia.ca)

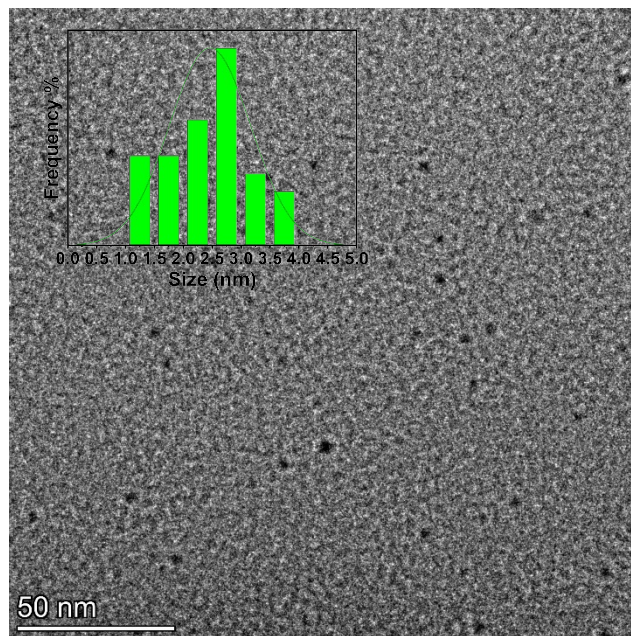

**Fig. S1** TEM image of PH6-CDs with associated size distribution histogram (CD average size:  $2.5 \text{ nm} \pm 0.7 \text{ nm}$ ).

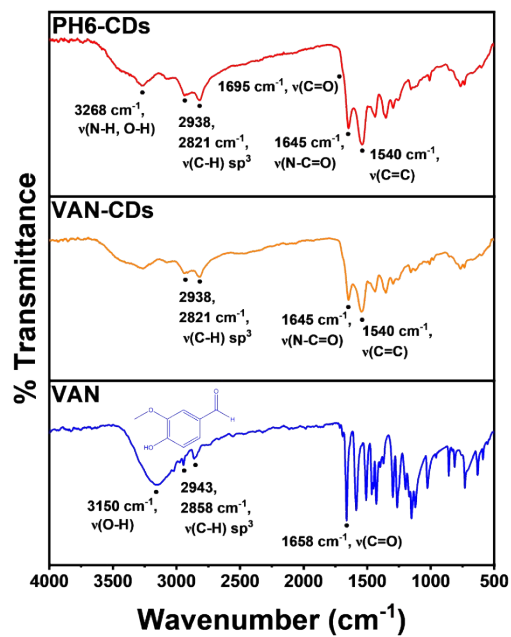

**Fig. S2** FT-IR of PH6-CDs, VAN-CDs and VAN to investigate conjugation of VAN.

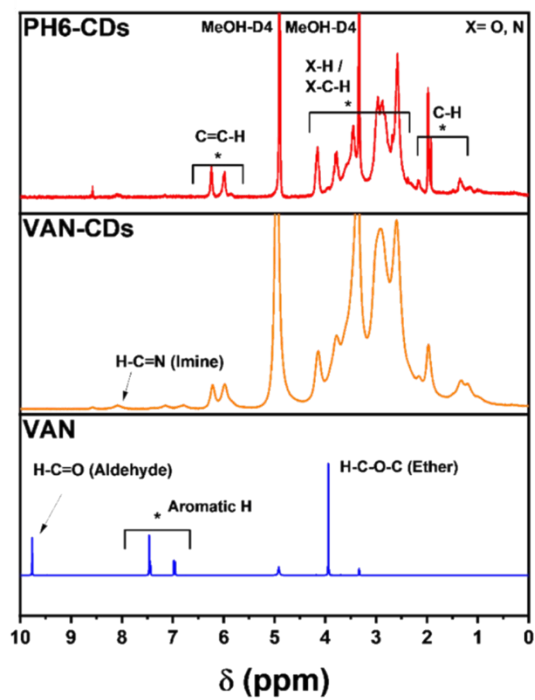

**Fig. S3**  $^1\text{H}$ -NMR carried out to determine formation of imine bonds (300 MHz, MeOD).

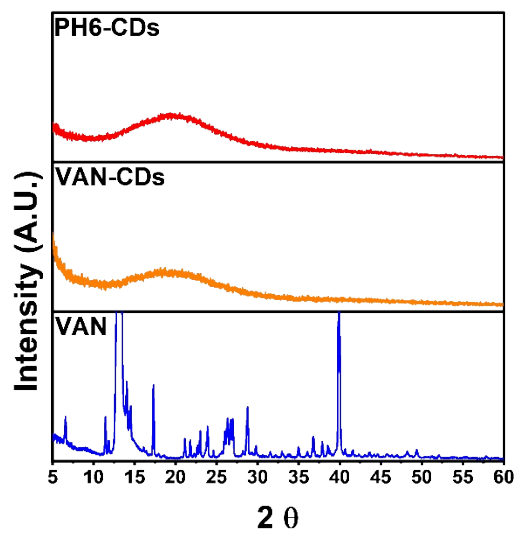

**Fig. S4** PXRD of PH6-CDs, VAN-CDs and VAN to assess changes in crystallinity after conjugation.

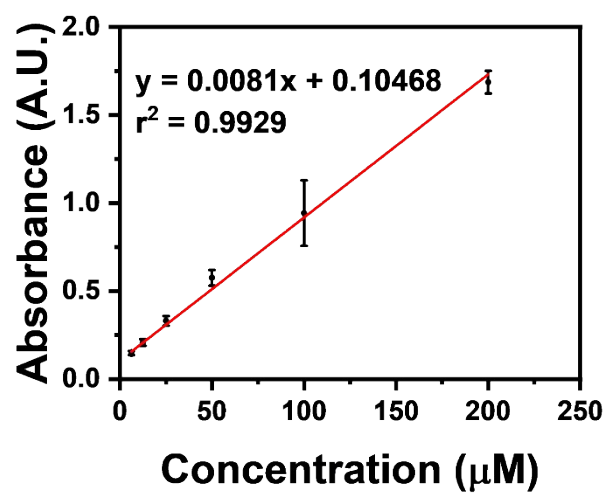

**Fig. S5** VAN standard curve obtained with absorbance readings at 275 nm with corresponding calibration equation. Error bars are a direct representation of uncertainty in the data based upon triplicate experiments.
